# Supplementary material for: POSS-functionalized polyphosphazene nanotube: preparation and effective reinforcement on UV-curable epoxy acrylate nanocomposite coatings
Source: Royal Society of Chemistry journal article supplement (doi:10.1039/c5ra23309g), 2015-12-08
Supplement: c5ra23309g1.pdf [file c5ra23309g1.pdf]

**Electronic Supplementary Material (ESI) for RSC Advances.**

**POSS-Functionalized Polyphosphazene Nanotube: Preparation and**

**Effective Reinforcement on UV-Curable Epoxy Acrylate**

**Nanocomposite Coatings**

Siyu Li <sup>b</sup>, Shuilai Qiu <sup>a</sup>, Bin Yu <sup>a, c</sup>, Weiyi Xing <sup>a, \*</sup>, Yuan Hu <sup>a, c, \*</sup>

*<sup>a</sup> State Key Laboratory of Fire Science, University of Science and Technology of China, 96 Jinzhai Road, Hefei, Anhui 230026, P.R. China*

*<sup>b</sup> Department of Polymer Science and Engineering, University of Science and Technology of China, 96 Jinzhai Road, Hefei, Anhui 230026, P.R. China*

*<sup>c</sup> Suzhou Key Laboratory of Urban Public Safety, Suzhou Institute for Advanced Study, University of Science and Technology of China, 166 Ren'ai Road, Suzhou, Jiangsu 215123, P.R. China*

### ***Thermal properties of EA and POPZS/EA nanocomposites***

DSC was used to investigate the thermal property of POPZS/EA nanocomposites. Glass transition temperature ( $T_g$ ) is determined from DSC curves, as shown in Fig. S1. It is observed that the  $T_g$ s of EA nanocomposites are 135.0°C, 140.8°C, 144.5°C, 147.8°C with increasing the loading of POPZS nanotubes from 0.1wt% to 3.0%, which is consistent with the DMA results. Compared to the pure EA, the maximal improvement in  $T_g$  is approximately 15.0 °C. Since the POPZS is covalently introduced into the EA matrix strengthening their interfacial interactions and has high stiffness reducing the flexibility of materials, the  $T_g$  values are remarkably enhanced.

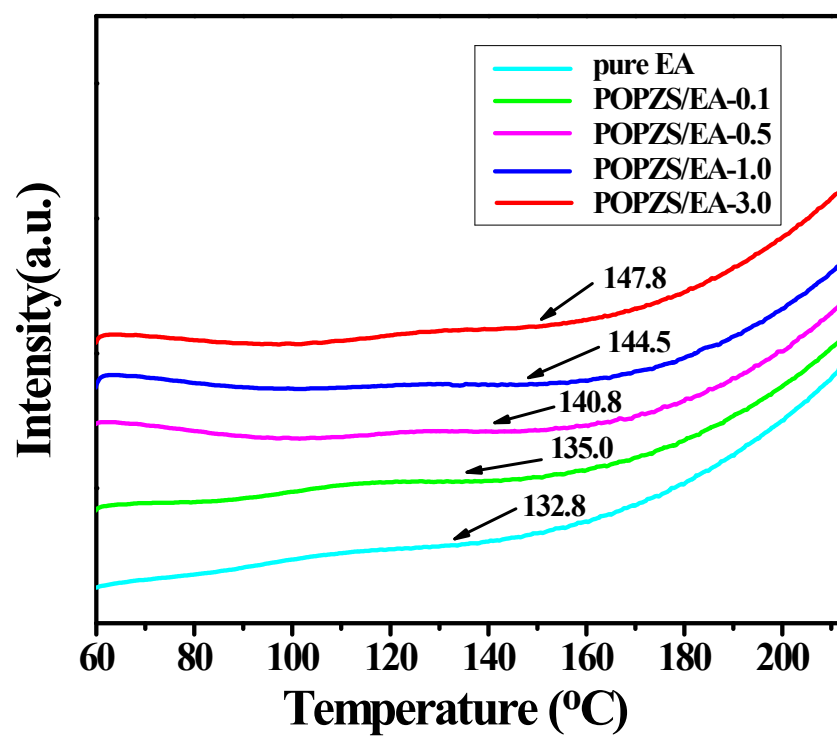

**Figure S1.** DSC curves of EA and POPZS/EA nanocomposites.
